# Supplementary material for: Cluster- and chain-based magnetic MOFs derived from 3d metal ions and 1,3,5-benzenetricarboxylate
Source: Royal Society of Chemistry journal article supplement (doi:10.1039/c5nj02161h), 2016-01-01
Supplement: c5nj02161h1.pdf [file c5nj02161h1.pdf]

***Electronic supplementary information (ESI)***

**Cluster- and chain-based magnetic MOFs derived from 3d metal ions and 1,3,5-benzenetricarboxylate**

**Sui-Jun Liu,<sup>ab</sup> Song-De Han,<sup>b</sup> Ze Chang<sup>\*b</sup> and Xian-He Bu<sup>b</sup>**

*<sup>a</sup>School of Metallurgy and Chemical Engineering, , and Engineering Research Center of High-Eficiency Development and Application Technology of Tungsten Resource, Jiangxi University of Science and Technology, Ganzhou 341000, Jiangxi Province, P.R. China.*

*<sup>b</sup>School of Materials Science and Engineering, TKL of Metal- and Molecule-Based Material Chemistry and Collaborative Innovation Center of Chemical Science and Engineering (Tianjin), Nankai University, Tianjin 300071, P.R. China*

---

\*Author to whom correspondence should be addressed. E-mail: changze@nankai.edu.cn. Fax: +86-22-23502458.

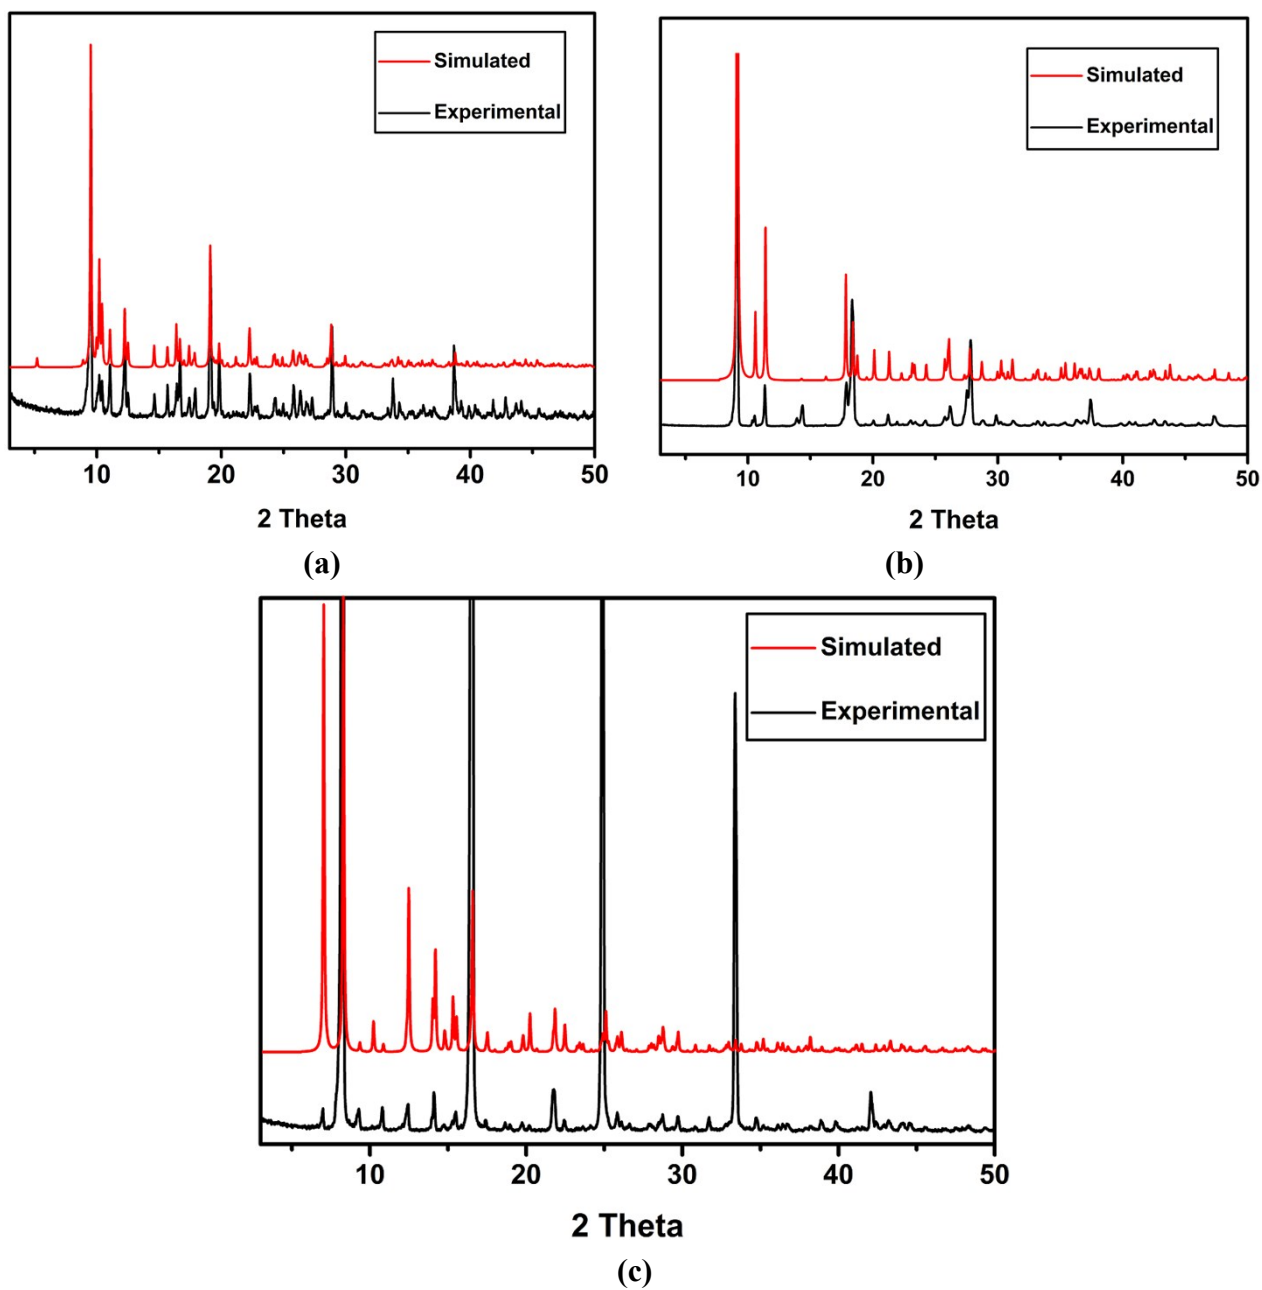

**Fig. S1** X-ray powder diffraction (PXRD) patterns of (a) **1**, (b) **2** and (c) **3**.

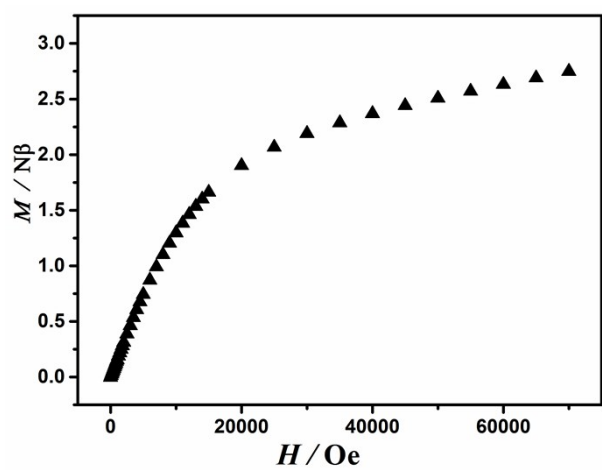

(a)

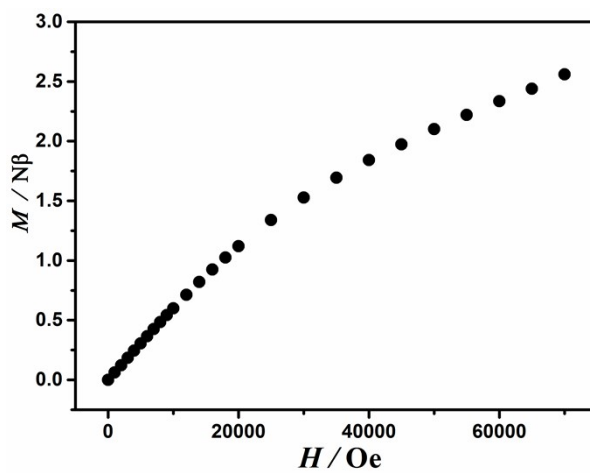

(b)

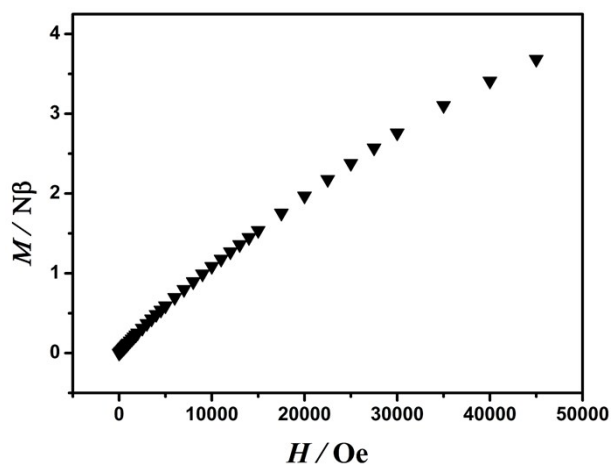

(c)

**Fig. S2** The  $M$  vs.  $H$  plots for 1 (a), 2 (b) and 3 (c) measured at 2 K.

**Table S1** Bond valences (*s*) calculated as  $s = \exp[(r_0-r)/B]$  with  $B = 0.37$ ,  $r_0 = 1.67$  for Ni(II)–O pairs and  $B = 0.37$ ,  $r_0 = 1.75$  for Ni(III)–O pairs.

**Ni1:**

| Nr | Bond         | Dist  | $r_0$ | B    | Sum  | Diff |
|----|--------------|-------|-------|------|------|------|
| 1  | Ni(1)-O(6)   | 1.939 | 1.75  | 0.37 | 2.90 | 0.10 |
| 2  | Ni(1)-O(1)   | 2.075 | 1.75  | 0.37 |      |      |
| 3  | Ni(1)-O(1)#5 | 2.075 | 1.75  | 0.37 |      |      |
| 4  | Ni(1)-O(1)#6 | 2.075 | 1.75  | 0.37 |      |      |
| 5  | Ni(1)-O(1)#3 | 2.075 | 1.75  | 0.37 |      |      |
| 6  | Ni(1)-O(5)   | 2.057 | 1.75  | 0.37 |      |      |

**Ni2:**

| Nr | Bond         | Dist  | $r_0$ | B    | Sum  | Diff |
|----|--------------|-------|-------|------|------|------|
| 1  | Ni(2)-O(6)   | 1.957 | 1.67  | 0.37 | 2.16 | 0.16 |
| 2  | Ni(2)-O(3)#6 | 2.010 | 1.67  | 0.37 |      |      |
| 3  | Ni(2)-O(3)   | 2.010 | 1.67  | 0.37 |      |      |
| 4  | Ni(2)-O(2)   | 2.021 | 1.67  | 0.37 |      |      |
| 5  | Ni(2)-O(2)#6 | 2.021 | 1.67  | 0.37 |      |      |
| 6  | Ni(2)-O(4)   | 2.110 | 1.67  | 0.37 |      |      |

**Table S2.** The reaction results of the addition of assistant reagents

|                   | <b>1</b> | <b>2</b> | <b>3</b> |
|-------------------|----------|----------|----------|
| NaCl              | √        | √        | ×        |
| none              | ×        | ×        | √        |
| NaNO <sub>3</sub> | √        | √        | ×        |
| KCl               | ×        | ×        | ×        |

**Table S3.** Selected bond lengths (Å) and angles (°) for **1<sup>a</sup>**

|                                         |           |                                          |           |
|-----------------------------------------|-----------|------------------------------------------|-----------|
| Co1—O1                                  | 1.992(7)  | Co3—O8                                   | 2.038(7)  |
| Co1—O9 <sup>#1</sup>                    | 2.038(9)  | Co3—O10 <sup>#1</sup>                    | 2.117(9)  |
| Co1—O13                                 | 1.978(6)  | Co3—O11 <sup>#4</sup>                    | 2.207(6)  |
| Co1—O15                                 | 2.053(10) | Co3—O12 <sup>#4</sup>                    | 2.189(7)  |
| Co2—O2                                  | 2.081(7)  | Co3—O13                                  | 2.037(6)  |
| Co2—O3 <sup>#2</sup>                    | 2.112(6)  | Na1A—O12                                 | 2.304(9)  |
| Co2—O6 <sup>#3</sup>                    | 2.221(7)  | Na1A—O16                                 | 2.377(14) |
| Co2—O7                                  | 2.068(7)  | Na1A—O19                                 | 2.345(11) |
| Co2—O13                                 | 2.054(7)  | Na1A—O19 <sup>#5</sup>                   | 2.593(10) |
| Co2—O14                                 | 2.102(7)  | Na1A—O20                                 | 2.297(9)  |
| Co3—O5 <sup>#3</sup>                    | 2.112(6)  |                                          |           |
| O1—Co1—O9 <sup>#1</sup>                 | 105.3(3)  | O13—Co3—O11 <sup>#4</sup>                | 94.3(2)   |
| O1—Co1—O15                              | 94.9(4)   | O13—Co3—O12 <sup>#4</sup>                | 153.1(2)  |
| O9 <sup>#1</sup> —Co1—O15               | 103.1(4)  | O12—Na1A—O16                             | 132.7(4)  |
| O13—Co1—O1                              | 120.6(3)  | O12—Na1A—O19 <sup>#5</sup>               | 80.0(3)   |
| O13—Co1—O9 <sup>#1</sup>                | 129.5(3)  | O12—Na1A—O19                             | 107.0(3)  |
| O13—Co1—O15                             | 93.2(3)   | O16—Na1A—O19 <sup>#5</sup>               | 65.7(4)   |
| O2—Co2—O3 <sup>#2</sup>                 | 86.1(3)   | O19—Na1A—O16                             | 100.8(5)  |
| O2—Co2—O6 <sup>#3</sup>                 | 88.4(3)   | O19—Na1A—O19 <sup>#5</sup>               | 83.8(3)   |
| O2—Co2—O14                              | 85.5(3)   | O20—Na1A—O12                             | 117.1(4)  |
| O3 <sup>#2</sup> —Co2—O6 <sup>#3</sup>  | 168.6(3)  | O20—Na1A—O16                             | 97.5(5)   |
| O7—Co2—O2                               | 168.3(3)  | O20—Na1A—O19 <sup>#5</sup>               | 162.3(4)  |
| O7—Co2—O3 <sup>#2</sup>                 | 90.0(3)   | O20—Na1A—O19                             | 94.7(4)   |
| O7—Co2—O6 <sup>#3</sup>                 | 97.2(3)   | O5 <sup>#3</sup> —Co3—C18 <sup>#4</sup>  | 134.7(3)  |
| O7—Co2—O14                              | 84.0(3)   | O8—Co3—O5 <sup>#3</sup>                  | 92.1(3)   |
| O13—Co2—O2                              | 94.8(3)   | O8—Co3—O10 <sup>#1</sup>                 | 169.5(4)  |
| O13—Co2—O3 <sup>#2</sup>                | 92.6(2)   | O8—Co3—O11 <sup>#4</sup>                 | 93.7(3)   |
| O13—Co2—O6 <sup>#3</sup>                | 77.9(3)   | O8—Co3—O12 <sup>#4</sup>                 | 87.5(3)   |
| O13—Co2—O7                              | 96.4(3)   | O8—Co3—C18 <sup>#4</sup>                 | 93.0(3)   |
| O13—Co2—O14                             | 170.7(3)  | O10 <sup>#1</sup> —Co3—O11 <sup>#4</sup> | 87.0(3)   |
| O14—Co2—O3 <sup>#2</sup>                | 96.7(3)   | O10 <sup>#1</sup> —Co3—O12 <sup>#4</sup> | 83.8(3)   |
| O14—Co2—O6 <sup>#3</sup>                | 92.9(3)   | O13—Co3—O5 <sup>#3</sup>                 | 99.7(2)   |
| O5 <sup>#3</sup> —Co3—O10 <sup>#1</sup> | 84.6(3)   | O13—Co3—O8                               | 102.9(3)  |
| O5 <sup>#3</sup> —Co3—O11 <sup>#4</sup> | 163.3(3)  | O13—Co3—O10 <sup>#1</sup>                | 87.4(3)   |
| O5 <sup>#3</sup> —Co3—O12 <sup>#4</sup> | 104.8(2)  | O12 <sup>#4</sup> —Co3—O11 <sup>#4</sup> | 59.9(2)   |

<sup>a</sup>Symmetry codes: #1:  $x+1/2, y-1/2, z$ ; #2:  $-x+1, y, -z+1$ ; #3:  $-x+3/2, y+1/2, -z+1$ ; #4:  $-x+3/2, y-1/2, -z+2$ ; #5:  $-x+1, y, -z+2$

**Table S4.** Selected bond lengths (Å) and angles (°) for **2<sup>a</sup>**

|                                        |           |                                        |            |
|----------------------------------------|-----------|----------------------------------------|------------|
| Ni1—O1                                 | 2.074(3)  | Ni1—O5                                 | 2.056(6)   |
| Ni2—O3                                 | 2.010(3)  | Ni1—O6 <sup>#5</sup>                   | 1.937(6)   |
| Ni2—O4                                 | 2.109(5)  | Ni2—O2 <sup>#6</sup>                   | 2.021(3)   |
| Ni2—O6                                 | 1.958(3)  |                                        |            |
| O1 <sup>#4</sup> —Ni1—O1 <sup>#3</sup> | 171.3(2)  | O2 <sup>#6</sup> —Ni2—O2 <sup>#7</sup> | 88.1(2)    |
| O1 <sup>#3</sup> —Ni1—O1               | 90.9(2)   | O2 <sup>#7</sup> —Ni2—O4               | 86.36(15)  |
| O1 <sup>#4</sup> —Ni1—O1               | 88.4(2)   | O2 <sup>#6</sup> —Ni2—O4               | 86.36(15)  |
| O1 <sup>#4</sup> —Ni1—O1 <sup>#2</sup> | 90.9(2)   | O1 <sup>#3</sup> —Ni1—O1 <sup>#2</sup> | 88.4(2)    |
| O1 <sup>#2</sup> —Ni1—O1               | 171.3(2)  | O3 <sup>#8</sup> —Ni2—O2 <sup>#6</sup> | 170.53(14) |
| O5—Ni1—O1 <sup>#2</sup>                | 85.64(10) | O3 <sup>#8</sup> —Ni2—O2 <sup>#7</sup> | 89.48(16)  |
| O5—Ni1—O1 <sup>#3</sup>                | 85.64(10) | O3—Ni2—O2 <sup>#7</sup>                | 170.53(14) |
| O5—Ni1—O1 <sup>#4</sup>                | 85.64(10) | O3—Ni2—O3 <sup>#8</sup>                | 91.4(2)    |
| O6 <sup>#5</sup> —Ni1—O1               | 94.36(10) | O3 <sup>#8</sup> —Ni2—O4               | 84.36(14)  |
| O6 <sup>#5</sup> —Ni1—O1 <sup>#3</sup> | 94.36(10) | O3—Ni2—O4                              | 84.36(14)  |
| O6 <sup>#5</sup> —Ni1—O1 <sup>#2</sup> | 94.36(10) | O6—Ni2—O2 <sup>#6</sup>                | 92.30(15)  |
| O6 <sup>#5</sup> —Ni1—O1 <sup>#4</sup> | 94.36(10) | O6—Ni2—O2 <sup>#7</sup>                | 92.30(15)  |
| O6 <sup>#5</sup> —Ni1—O5               | 180.0     | O6—Ni2—O3                              | 96.94(14)  |
| O6—Ni2—O4                              | 178.1(2)  | O6—Ni2—O3 <sup>#8</sup>                | 96.93(14)  |

<sup>a</sup>Symmetry codes: #1:  $-x+1, y, z$ ; #2:  $-x+2, -y, z$ ; #3:  $-x+2, y, z$ ; #4:  $x, -y, z$ ; #5:  $x+1/2, y-1/2, z+1/2$ ; #6:  $-x+3/2, -y+1/2, z-1/2$ ; #7:  $-x+3/2, y+1/2, z-1/2$ ; #8:  $x, -y+1, z$ .

**Table S5.** Selected bond lengths (Å) and angles (°) for **3<sup>a</sup>**

|                                        |            |                                        |           |
|----------------------------------------|------------|----------------------------------------|-----------|
| O6—Mn1 <sup>#1</sup>                   | 2.191(5)   | Mn2—O2                                 | 2.171(5)  |
| Mn1—O2                                 | 2.505(7)   | Mn2—O5                                 | 2.200(4)  |
| Mn1—O5                                 | 2.245(5)   | Mn1—O3                                 | 2.126(4)  |
| Mn1—O1                                 | 2.246(5)   | Mn1—O7 <sup>#2</sup>                   | 2.092(4)  |
| Mn2—O4                                 | 2.088(4)   |                                        |           |
| O7 <sup>#2</sup> —Mn1—O3               | 87.11(16)  | O4—Mn2—O2 <sup>#3</sup>                | 92.3(2)   |
| O6 <sup>#1</sup> —Mn1—O2               | 91.8(2)    | O4 <sup>#3</sup> —Mn2—O2 <sup>#3</sup> | 87.7(2)   |
| O6 <sup>#1</sup> —Mn1—O5               | 94.46(18)  | O4 <sup>#3</sup> —Mn2—O2               | 92.3(2)   |
| O6 <sup>#1</sup> —Mn1—O1               | 85.6(2)    | O4 <sup>#3</sup> —Mn2—O5               | 91.27(17) |
| O5—Mn1—O2                              | 70.14(17)  | O4 <sup>#3</sup> —Mn2—O5 <sup>#3</sup> | 88.73(17) |
| O5—Mn1—O1                              | 124.00(19) | O4—Mn2—O5 <sup>#3</sup>                | 91.27(17) |
| O1—Mn1—O2                              | 53.92(18)  | O4—Mn2—O5                              | 88.73(18) |
| O3—Mn1—O6 <sup>#1</sup>                | 176.52(18) | O4—Mn2—O4 <sup>#3</sup>                | 180.0     |
| O3—Mn1—O2                              | 89.98(18)  | O2—Mn2—O5 <sup>#3</sup>                | 102.5(2)  |
| O3—Mn1—O5                              | 88.95(18)  | O2—Mn2—O5                              | 77.5(2)   |
| O3—Mn1—O1                              | 93.0(2)    | O2 <sup>#3</sup> —Mn2—O5               | 102.5(2)  |
| O7 <sup>#2</sup> —Mn1—O6 <sup>#1</sup> | 90.19(18)  | O2 <sup>#3</sup> —Mn2—O5 <sup>#3</sup> | 77.5(2)   |
| O7 <sup>#2</sup> —Mn1—O2               | 159.97(18) | O5 <sup>#3</sup> —Mn2—O5               | 180.0     |
| O7 <sup>#2</sup> —Mn1—O5               | 129.55(18) | O4—Mn2—O2                              | 87.7(2)   |
| O7 <sup>#2</sup> —Mn1—O1               | 106.4(2)   | O2—Mn2—O2 <sup>#3</sup>                | 180.0     |

<sup>a</sup>Symmetry codes: #1:  $x, -y+1/2, -z$ ; #2:  $-x, y-1/2, z$ ; #3:  $-x+1, -y+1, -z$ .
